# Supplementary material
Source: PubMed Central journal article supplement (PMC2783546)
Supplement: NIHMS144464-supplement-Supplementary_Data.pdf [file NIHMS144464-supplement-Supplementary_Data.pdf]

## **Supplemental Material**

**for**

### **Immunomodulatory Activity of Oenothain B Isolated from *Epilobium angustifolium***

Igor A. Schepetkin,\* Liliya N. Kirpotina,\* Andrei I. Khlebnikov,<sup>†</sup> Larissa Jakiw,\* Christie  
L. Blaskovich,\* Mark A. Jutila,\* and Mark T. Quinn\*

*\*Department of Veterinary Molecular Biology*

*Montana State University, Bozeman, MT 59717, USA*

*<sup>†</sup>Department of Chemistry*

*Altai State Technical University, Barnaul 656038, Russia*

## Supplemental Table S1. NMR Spectroscopy of Subfraction S-3

### <sup>1</sup>H NMR [500 MHz, D<sub>2</sub>O]

**β-glucose:** δ 4.47 (*d*, *J* 9 Hz, H-1), 5.09 (*dd*, *J*<sub>1</sub> 6.5, *J*<sub>2</sub> 9 Hz, H-2), 5.29 (*t*, *J* 9.5 Hz, H-3), 4.89 (*t*, *J* 10.5 Hz, H-4), 3.92 (*dd*, *J*<sub>1</sub> 5.5, *J*<sub>2</sub> 10.5 Hz, H-5), 4.45 (*d*, *J* 12.5 Hz, H-6), 3.75 (*d*, *J* 12.5 Hz, H-6); **ring A:** 6.41 (*s*, H-6); **ring B:** 6.28 (*s*, H-6'); **ring C:** 6.53 (*s*, H-6'); **ring G:** 6.95 (2H, *s*, H-2'' and H-6''); **α-glucose:** 5.47 (*d*, *J* 3.4 Hz, H-1), 5.36 (*dd*, *J*<sub>1</sub> 3.4, *J*<sub>2</sub> 10.5 Hz, H-2), 5.60 (*t*, *J* 10 Hz, H-3), 4.99 (*t*, *J* 9 Hz, H-4), 4.53 (*dd*, *J*<sub>1</sub> 7, *J*<sub>2</sub> 9 Hz, H-5), 4.48 (*d*, *J* 12 Hz, H-6), 3.73 (*d*, *J* 12 Hz, H-6); **ring A':** 6.15 (*s*, H-6'); **ring B':** 6.15 (*s*, H-6'); **ring C':** 6.42 (*s*, H-6'); **ring G':** 6.57 (2H, *s*, H-2'' and H-6').

### <sup>13</sup>C NMR [400 MHz, D<sub>2</sub>O]

**β-glucose:** δ 94.8 (C-1), 74.8 (C-2), 71.0 (C-3), 72.2 (C-4), 70.6 (C-5), 63.5 (C-6); **ring A:** 124.6 (C-1'), 116.3 (C-2'), 143.5 (C-3'), 136.1 (C-4'), 145.8 (C-5'), 106.5 (C-6'), 169.8 (CO); **ring B:** 125.0 (C-1'), 116.7 (C-2'), 146.4 (C-3'), 134.4 (C-4'), 148.0 (C-5'), 105.4 (C-6'), 169.5 (CO); **ring C:** 115.0 (C-1'), 139.7 (C-2'), 140.5 (C-3'), 140.8 (C-4'), 142.9 (C-5'), 113.7 (C-6'), 168.8 (CO); **ring G:** 119.2 (C-1''), 108.7 (C-2'' and C-6''), 144.3 (C-3'' and C-5''), 138.6 (C-4''), 166.3 (CO); **α-glucose:** 89.5 (C-1), 74.3 (C-2), 69.9 (C-3), 69.5 (C-4), 67.4 (C-5), 63.2 (C-6); **ring A':** 121.4 (C-1'), 115.1 (C-2'), 144.0 (C-3'), 134.8 (C-4'), 144.8 (C-5'), 106.9 (C-6'), 169.1 (CO); **ring B':** 124.8 (C-1'), 116.7 (C-2'), 144.3 (C-3'), 135.9 (C-4'), 147.5 (C-5'), 106.5 (C-6'), 169.6 (CO); **ring C':** 114.3 (C-1'), 137.5 (C-2'), 139.1 (C-3'), 141.6 (C-4'), 142.3 (C-5'), 109.8 (C-6'), 167.1 (CO); **ring G':** 117.7 (C-1''), 110.3 (C-2'' and C-6''), 144.4 (C-3'' and C-5''), 138.6 (C-4''), 169.4 (CO).

# Supplemental Figure S1. Chemical Structure of Oenothin B

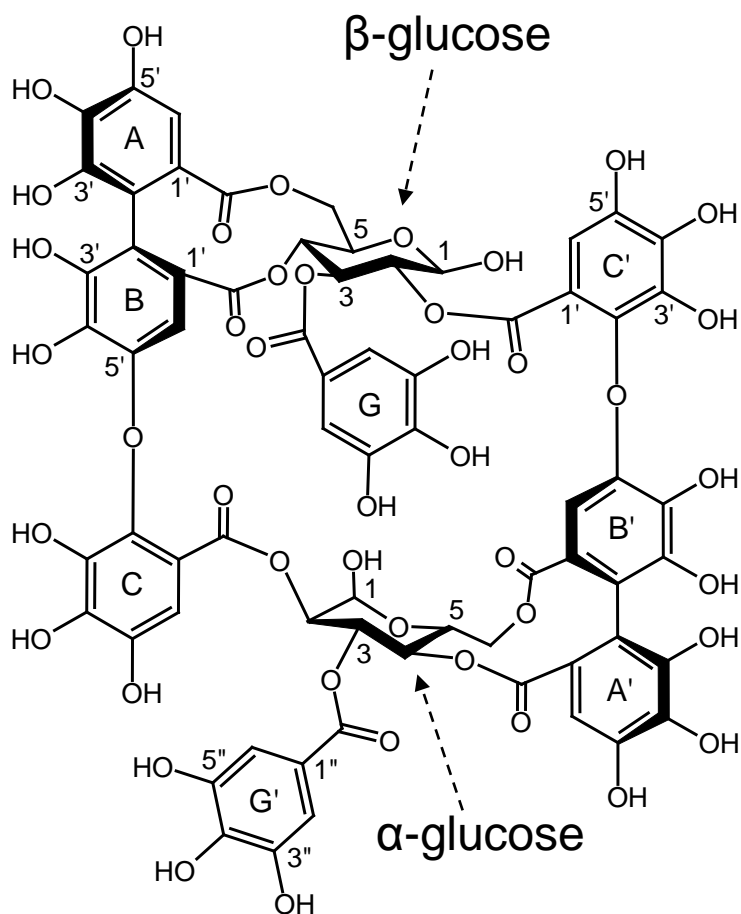

## Supplemental Figure S2. Mass Spectrum of Subfraction S-3

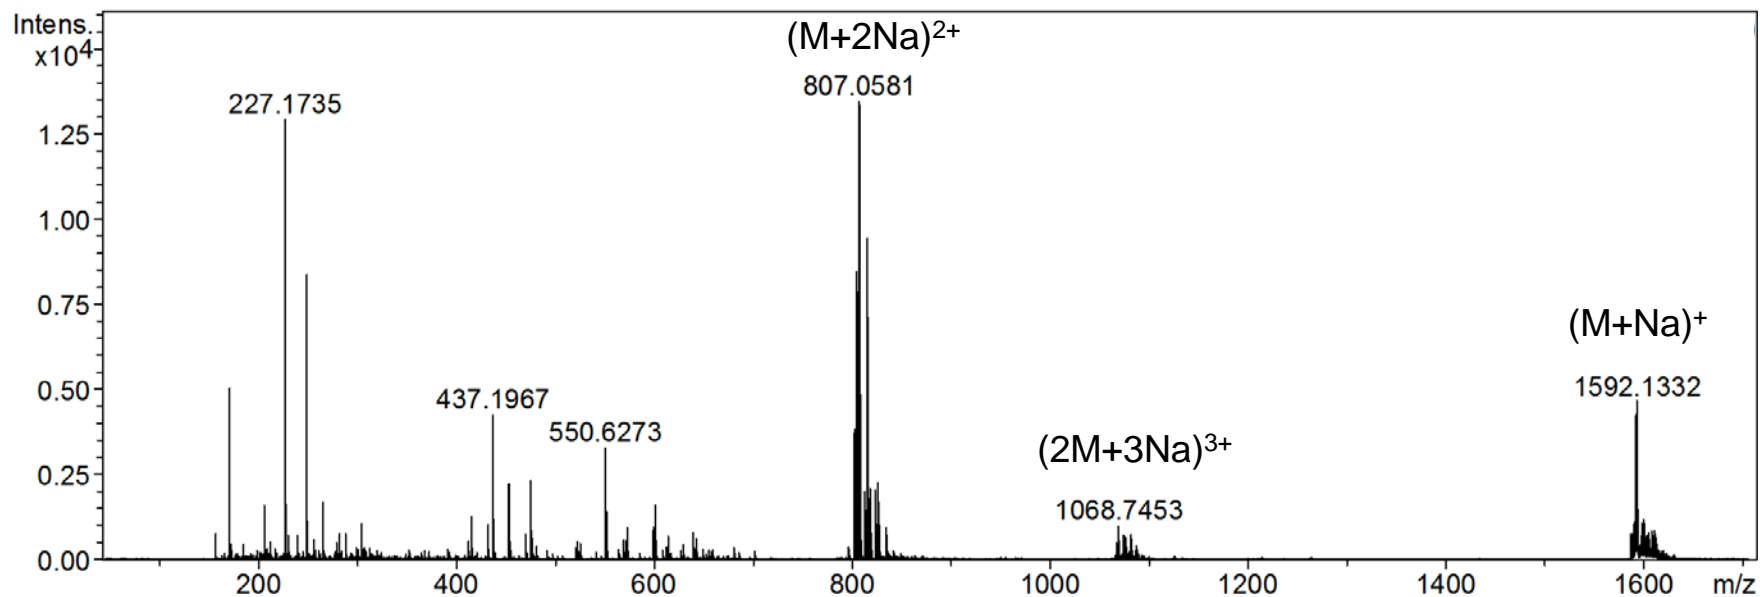

Mass spectrometry experiments were performed using a Bruker Microtof high resolution time of flight mass spectrometer (Bruker Daltonics, Inc., Billerica, MA).

# Supplemental Figure S3. Structures of Related Compounds Under Investigation

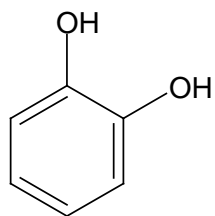

Pyrocatechol

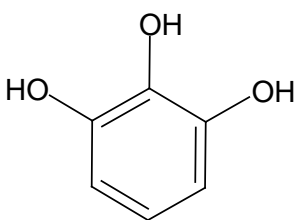

Pyrogallol

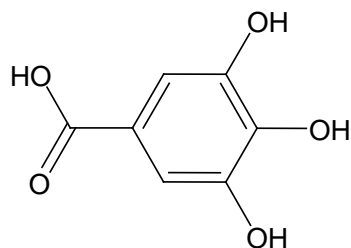

Gallic acid

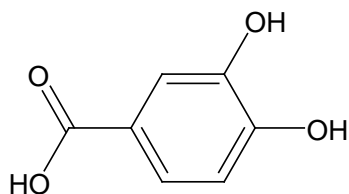

3,4-dihydroxybenzoic acid (protocatechuic acid)

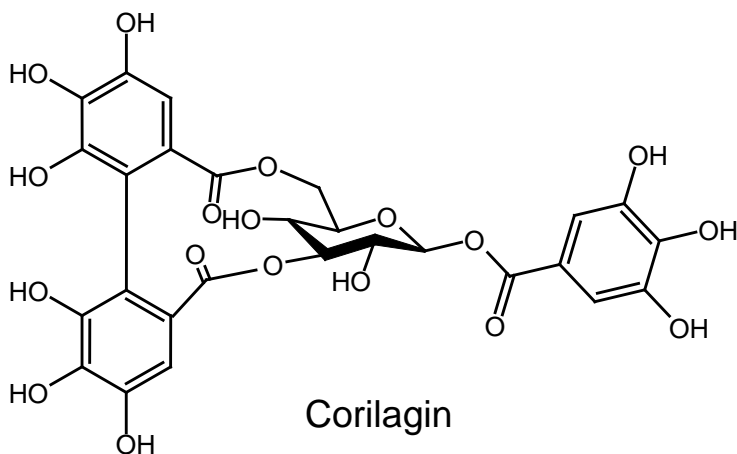

Corilagin

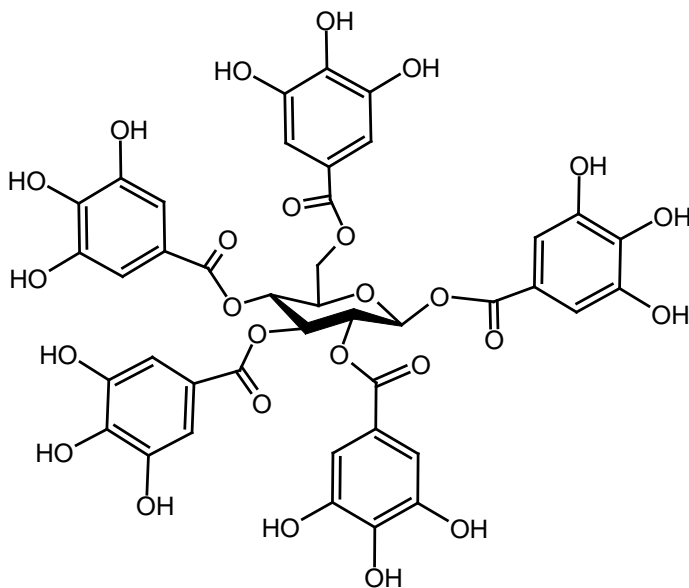

1,2,3,4,6-pentakis-O-galloyl- $\beta$ -D-glucose (PGG)

## Supplemental Figure S4. Effect of Oenothein B and Related Compounds on NF- $\kappa$ B Activity

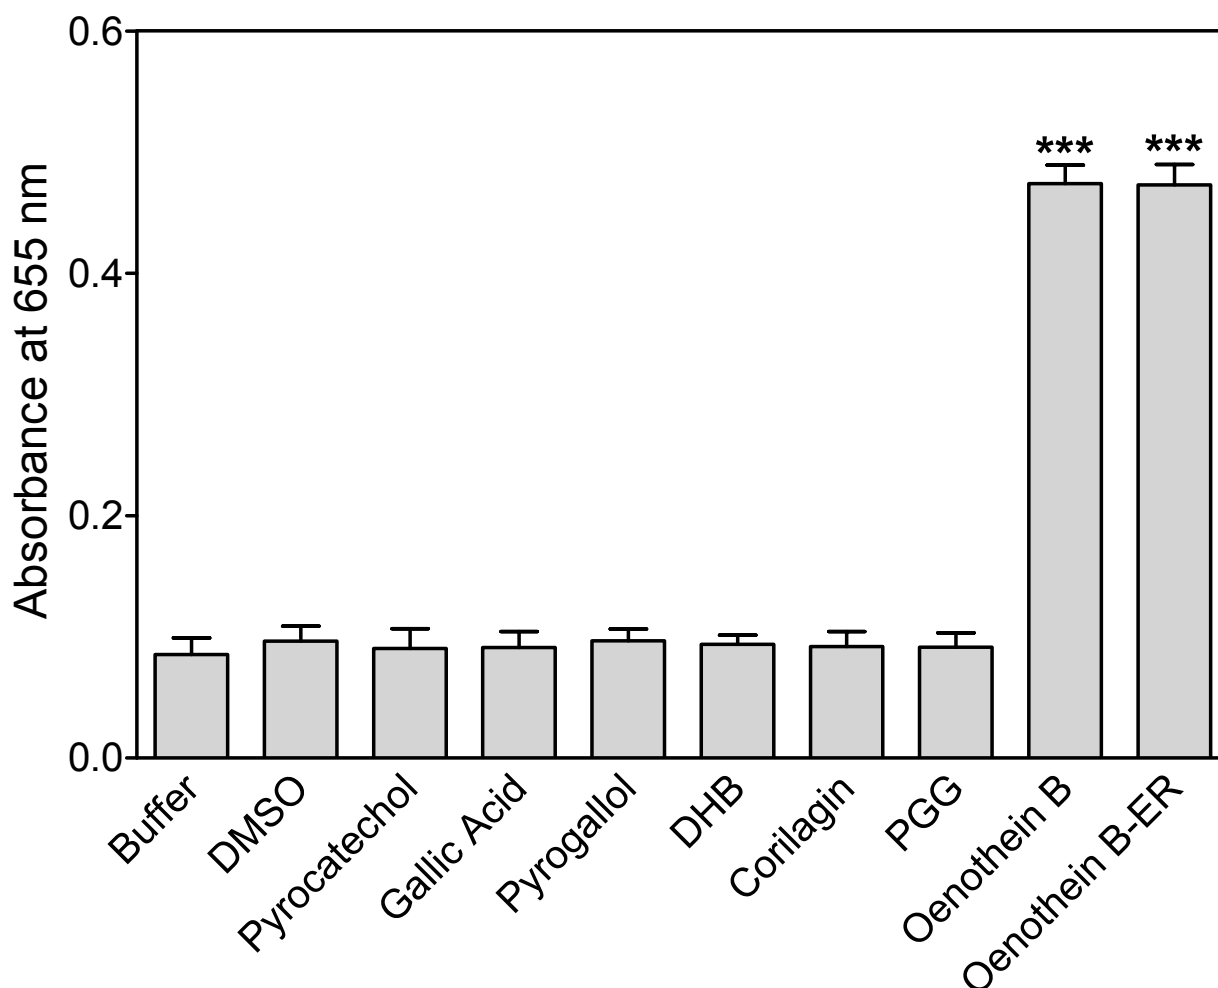

THP1-Blue monocytes ( $2 \times 10^5$  cells/well) were incubated for 24 hr with 100  $\mu$ M pyrocatechol, gallic acid, pyrogallol, and 3,4-dihydroxybenzoic acid (DHB); 50  $\mu$ M corilagin and PGG; and 25  $\mu$ M oenothein B (OB) and oenothein B pretreated with endotoxin-removing gel (OBr). Alkaline phosphatase release was analyzed spectrophotometrically in the cell supernatant. The data are presented as mean  $\pm$  S.D. of triplicate samples from one experiment that is representative of three independent experiments. Statistically significant differences (\*\*\*)  $P < 0.001$  versus buffer or DMSO controls are indicated.
